# Supplementary material
Source: Elsevier journal article supplement (https://www.sciencedirect.com/science/article/pii/S2254887421001041)
Supplement: mmc1 [file S2254887421001041:mmc1.pdf]

**Table 2.** Univariate and multivariate Cox proportional regression models for the first recurrent event.

| Variable                             | Univariate       |        | Multivariate     |       |                  |       |                              |       |                    |       |                               |       |                  |                  |                  |       |                  |       |
|--------------------------------------|------------------|--------|------------------|-------|------------------|-------|------------------------------|-------|--------------------|-------|-------------------------------|-------|------------------|------------------|------------------|-------|------------------|-------|
|                                      |                  |        | Model 0          |       | Model 1          |       | Model 2<br>Framingham-Wilson |       | Model 3<br>REGICOR |       | Model 4<br>SCORE <sup>b</sup> |       | Model 5<br>SMART |                  | Model 6<br>REACH |       | Model 7<br>B-TIM |       |
|                                      | HR (CI95%)       | p      | HR (CI95%)       | p     | HR (CI95%)       | p     | HR (CI95%)                   | p     | HR (CI95%)         | p     | HR (CI95%)                    | p     | HR (CI95%)       | p                | HR (CI95%)       | p     | HR (CI95%)       | p     |
| Age (Δ 5 yr.)                        | 1.15 (0.97-1.37) | 0.100  | 1.18 (0.98-1.4)  | 0.074 | 1.06 (0.88-1.28) | 0.515 |                              |       |                    |       |                               |       |                  |                  |                  |       |                  |       |
| Sex (Ref. Female)                    | 0.94 (0.51-1.73) | 0.832  | 0.9 (0.48-1.7)   | 0.747 | 0.72 (0.37-1.4)  | 0.339 |                              |       |                    |       |                               |       |                  |                  |                  |       |                  |       |
| Current smoker                       | 1.97 (1.11-3.49) | 0.020  | 1.81 (0.91-3.56) | 0.089 | 1.57 (0.76-3.25) | 0.226 |                              |       |                    |       |                               |       |                  |                  |                  |       |                  |       |
| Total Cholesterol (Δ 0.26 mmol/L)    | 1.05 (0.99-1.11) | 0.13   | 1.03 (0.96-1.1)  | 0.382 | 1.03 (0.96-1.1)  | 0.363 |                              |       |                    |       |                               |       |                  |                  |                  |       |                  |       |
| LDL cholesterol (Δ 0.26 mmol/L)      | 1.04 (0.97-1.12) | 0.218  |                  |       |                  |       |                              |       |                    |       |                               |       |                  |                  |                  |       |                  |       |
| HDL cholesterol (Δ 0.13 mmol/L)      | 1 (0.89-1.11)    | 0.936  |                  |       |                  |       |                              |       |                    |       |                               |       |                  |                  |                  |       |                  |       |
| Hypertension                         | 1.63 (0.92-2.89) | 0.093  | 1.16 (0.6-2.22)  | 0.656 | 0.76 (0.38-1.53) | 0.448 |                              |       |                    |       |                               |       |                  |                  |                  |       |                  |       |
| Diabetes                             | 2.55 (1.54-4.23) | <0.001 | 2.45 (1.39-4.31) | 0.002 | 2.13 (1.15-3.94) | 0.017 |                              |       |                    |       |                               |       |                  |                  |                  |       |                  |       |
| Obesity (BMI ≥30 Kg/m <sup>2</sup> ) | 0.96 (0.56-1.64) | 0.882  |                  |       |                  |       |                              |       |                    |       |                               |       |                  |                  |                  |       |                  |       |
| Polyvascular disease                 |                  |        |                  |       |                  |       |                              |       |                    |       |                               |       |                  |                  |                  |       |                  |       |
| Two territories                      | 1.81 (1-3.28)    | 0.0499 |                  |       | 1.12 (0.53-2.35) | 0.768 | 1.24 (0.63-2.43)             | 0.536 | 1.29 (0.65-2.56)   | 0.464 | 1.35 (0.69-2.64)              | 0.374 |                  |                  |                  |       | 0.97 (0.49-1.93) | 0.935 |
| Three territories                    | 5.6 (2.2-14.25)  | <0.001 |                  |       | 3.25 (1.07-9.89) | 0.038 | 3.89 (1.36-11.1)             | 0.011 | 3.71 (1.32-10.42)  | 0.013 | 4.03 (1.42-11.4)              | 0.009 |                  |                  |                  |       | 3.29 (1.18-9.13) | 0.022 |
| Albuminuria*                         | 3.55 (2.06-6.11) | <0.001 |                  |       | 2.54 (1.32-4.87) | 0.005 | 2.55 (1.39-4.68)             | 0.003 | 2.68 (1.48-4.88)   | 0.001 | 2.56 (1.4-4.68)               | 0.002 |                  | 2.75 (1.54-4.91) | 0.001            |       |                  |       |
| ABI ≤0.9 (on either side)            | 2.34 (1.41-3.86) | <0.001 |                  |       | 1.38 (0.71-2.68) | 0.341 | 1.35 (0.7-2.63)              | 0.369 | 1.45 (0.76-2.79)   | 0.261 | 1.42 (0.75-2.7)               | 0.278 |                  | 1.37 (0.75-2.5)  | 0.312            |       | 1.55 (0.84-2.86) | 0.161 |
| Atrial fibrillation history          | 2.76 (1.31-5.82) | 0.007  |                  |       | 1.73 (0.74-4.04) | 0.205 | 1.58 (0.69-3.65)             | 0.28  | 1.58 (0.68-3.67)   | 0.285 | 1.64 (0.71-3.78)              | 0.246 |                  |                  |                  |       | 2.19 (1-4.8)     | 0.05  |
| Heart Failure                        | 3.11 (1.34-7.25) | 0.0085 |                  |       | 2.62 (1.05-6.55) | 0.039 | 3.02 (1.21-7.51)             | 0.018 | 2.91 (1.16-7.32)   | 0.023 | 3.1 (1.26-7.63)               | 0.014 |                  |                  |                  |       |                  |       |
| Index event                          |                  |        |                  |       |                  |       |                              |       |                    |       |                               |       |                  |                  |                  |       |                  |       |
| Coronary                             | Ref.             | -      | Ref.             | -     | Ref.             | -     | Ref.                         | -     | Ref.               | -     | Ref.                          | -     | Ref.             | -                | Ref.             | -     | Ref.             | -     |
| Cerebrovascular                      | 1.07 (0.59-1.94) | 0.822  | 0.9 (0.48-1.68)  | 0.737 | 1.26 (0.64-2.51) | 0.503 | 1.45 (0.75-2.78)             | 0.268 | 1.47 (0.76-2.83)   | 0.25  | 1.43 (0.74-2.77)              | 0.287 | 1.28 (0.7-2.36)  | 0.42             | 1.33 (0.69-2.55) | 0.392 | 1.33 (0.7-2.52)  | 0.389 |
| Peripheral Artery Disease            | 2.27 (1.21-4.26) | 0.010  | 1.43 (0.67-3.07) | 0.354 | 1.32 (0.57-3.03) | 0.516 | 1.86 (0.9-3.86)              | 0.094 | 1.96 (0.96-4.03)   | 0.066 | 1.89 (0.92-3.87)              | 0.083 | 1.9 (1-3.63)     | 0.05             | 1.68 (0.84-3.35) | 0.139 | 1.14 (0.54-2.39) | 0.731 |
| Framingham-Wilson                    |                  |        |                  |       |                  |       |                              |       |                    |       |                               |       |                  |                  |                  |       |                  |       |
| <10%                                 | Ref.             | -      |                  |       |                  |       | Ref.                         | -     |                    |       |                               |       |                  |                  |                  |       |                  |       |
| 10-19%                               | 1.19 (0.61-2.34) | 0.612  |                  |       |                  |       | 0.84 (0.41-1.69)             | 0.615 |                    |       |                               |       |                  |                  |                  |       |                  |       |
| ≥20%                                 | 3.08 (1.65-5.75) | <0.001 |                  |       |                  |       | 1.44 (0.7-2.94)              | 0.318 |                    |       |                               |       |                  |                  |                  |       |                  |       |
| REGICOR                              |                  |        |                  |       |                  |       |                              |       |                    |       |                               |       |                  |                  |                  |       |                  |       |
| <5%                                  | Ref.             | -      |                  |       |                  |       |                              |       | Ref.               | -     |                               |       |                  |                  |                  |       |                  |       |
| 5-9%                                 | 1.63 (0.92-2.9)  | 0.097  |                  |       |                  |       |                              |       | 1.14 (0.61-2.12)   | 0.691 |                               |       |                  |                  |                  |       |                  |       |
| ≥10%                                 | 2.71 (1.39-5.27) | 0.003  |                  |       |                  |       |                              |       | 1.25 (0.58-2.68)   | 0.574 |                               |       |                  |                  |                  |       |                  |       |
| SCORE <sup>b</sup>                   |                  |        |                  |       |                  |       |                              |       |                    |       |                               |       |                  |                  |                  |       |                  |       |
| <1%                                  | Ref.             | -      |                  |       |                  |       |                              |       |                    |       | Ref.                          | -     |                  |                  |                  |       |                  |       |
| 1-4%                                 | 1.06 (0.48-2.31) | 0.888  |                  |       |                  |       |                              |       |                    |       | 0.74 (0.33-1.69)              | 0.478 |                  |                  |                  |       |                  |       |
| ≥5%                                  | 2.14 (1.01-4.5)  | 0.0461 |                  |       |                  |       |                              |       |                    |       | 1.11 (0.5-2.47)               | 0.793 |                  |                  |                  |       |                  |       |
| SMART (points)                       |                  |        |                  |       |                  |       |                              |       |                    |       |                               |       |                  |                  |                  |       |                  |       |
| <8                                   | Ref.             | -      |                  |       |                  |       |                              |       |                    |       |                               |       | Ref.             | -                |                  |       |                  |       |
| 8-10                                 | 1.18 (0.5-2.76)  | 0.705  |                  |       |                  |       |                              |       |                    |       |                               |       | 1.26 (0.53-2.98) | 0.596            |                  |       |                  |       |
| ≥11                                  | 3.17 (1.55-6.5)  | 0.001  |                  |       |                  |       |                              |       |                    |       |                               |       | 3.11 (1.34-7.23) | 0.008            |                  |       |                  |       |
| REACH <sup>f</sup>                   |                  |        |                  |       |                  |       |                              |       |                    |       |                               |       |                  |                  |                  |       |                  |       |
| <5%                                  |                  |        |                  |       |                  |       |                              |       |                    |       |                               |       |                  |                  | Ref.             | -     |                  |       |
| 5-10%                                | 1.52 (0.82-2.82) | 0.189  |                  |       |                  |       |                              |       |                    |       |                               |       |                  |                  | 1.05 (0.54-2.03) | 0.891 |                  |       |
| >10%                                 | 5.74 (2.83-11.7) | <0.001 |                  |       |                  |       |                              |       |                    |       |                               |       |                  |                  | 3.07 (1.38-6.86) | 0.006 |                  |       |

|                                         |                  |       |       |       |       |       |       |                   |       |
|-----------------------------------------|------------------|-------|-------|-------|-------|-------|-------|-------------------|-------|
| B-TIMI (points)                         |                  |       |       |       |       |       |       |                   |       |
| <1                                      |                  |       |       |       |       |       |       | Ref.              | -     |
| 1-2                                     | 0.99 (0.24-4.19) | 0.995 |       |       |       |       |       | 1 (0.23-4.37)     | 0.999 |
| ≥3                                      | 3.68 (0.88-15.3) | 0.074 |       |       |       |       |       | 2.79 (0.62-12.58) | 0.182 |
| Grønnesby and Borgan's omnibus test (p) |                  |       | 0.83  | 0.185 | 0.254 | 0.055 | 0.778 | 0.216             | 0.12  |
| R <sup>2</sup> de Nagelkerke            |                  |       | 0.179 | 0.148 | 0.146 | 0.145 | 0.087 | 0.127             | 0.128 |

FRAM-Wilson: Framingham Wilson; REGICOR: Registre Gironi del Cor; SCORE: Systematic COronary Risk Evaluation; SMART: Second manifestations of ARterial disease; REACH: REduction of Atherothrombosis for Continued Health Registry; TIMI: Thrombolysis In Myocardial Infarction - TIMI Study Group; ABI: Ankle/Brachial index; BMI: Body Mass Index.

<sup>a</sup> Albuminuria: Albumin/creatinine ratio >3.4 mg/mmol.

<sup>b</sup> SCORE risk for diabetic patients was obtained multiplying the score risk function by 3 in men and by 5 in women.

<sup>c</sup> REACH. Stratification based on risk function to estimate the next cardiovascular event.

**Table 5.** Risk stratification according to usual cut-off points for risk function/score Framingham, REGICOR, SCORE, REACH, TIMI and SMART by index event.

| Risk function/score | Absolute Risk | Global      | Coronary          | Cerebrovascular  | Peripheral Artery Disease | p      |
|---------------------|---------------|-------------|-------------------|------------------|---------------------------|--------|
|                     |               | (n = 268)   | (n = 141; 52,6 %) | (n = 86; 32.1% ) | (n = 41; 15,3%)           |        |
| Framingham-Wilson   | <10%          | 105 (39.2%) | 66 (46.8%)        | 31 (36%)         | 8 (19.5%)                 | <0.001 |
|                     | [10-19%)      | 97 (36.2%)  | 54 (38.3%)        | 33 (38.4%)       | 10 (24.4%)                |        |
|                     | ≥20%          | 66 (24.6%)  | 21 (14.9%)        | 22 (25.6%)       | 23 (56.1%)                |        |
| REGICOR             | <5%           | 151 (56.3%) | 92 (65.2%)        | 46 (53.5%)       | 13 (31.7%)                | <0.001 |
|                     | [5-9)%        | 83 (31%)    | 41 (29.1%)        | 27 (31.4%)       | 15 (36.6%)                |        |
|                     | ≥10%          | 34 (12.7%)  | 8 (5.7%)          | 13 (15.1%)       | 13 (31.7%)                |        |
| SCORE <sup>a</sup>  | <1%           | 56 (20.9%)  | 35 (24.8%)        | 14 (16.3%)       | 7 (17.1%)                 | 0.001  |
|                     | [1-4%)        | 117 (43.7%) | 71 (50.4%)        | 36 (41.9%)       | 10 (24.4%)                |        |
|                     | ≥5%           | 95 (35.4%)  | 35 (24.8%)        | 36 (41.9%)       | 24 (58.5%)                |        |
| REACH               | <5%           | 102 (37.9%) | 71 (50%)          | 22 (25.6%)       | 9 (22%)                   | <0.001 |
|                     | 5-10%         | 140 (52%)   | 55 (38.7%)        | 62 (72.1%)       | 23 (56%)                  |        |
|                     | ≥10%          | 27 (10%)    | 16 (11.3%)        | 2 (2.3%)         | 9 (22%)                   |        |
| TIMI                | 0 points      | 14 (5.2%)   | 2 (1.4%)          | 12 (14%)         | 0 (0%)                    | <0.001 |
|                     | 1-2 points    | 181 (67.3%) | 111 (78.2%)       | 57 (66.3%)       | 13 (31.7%)                |        |
|                     | ≥3 points     | 74 (27.5%)  | 29 (20.4%)        | 17 (19.8%)       | 28 (68.3%)                |        |
| SMART               | <8 points     | 51 (19.2%)  | 17 (12.1%)        | 27 (31.8%)       | 7 (17.1%)                 | <0.001 |
|                     | 8-11 points   | 130 (48.9%) | 79 (56.4%)        | 39 (45.9%)       | 12 (29.3%)                |        |

>11 points      85 (32%)      44 (31.4%)      19 (22.4%)      22 (53.7%)

---

REACH: REduction of Atherothrombosis for Continued Health Registry; REGICOR: Registre GironI del Cor; SCORE *Systematic* COronary Risk Evaluation; SMART: Second manifestations of ARTerial disease; TIMI: Thrombolysis In Myocardial Infarction – TIMI Study Group.

<sup>a</sup> SCORE risk for diabetic patients was obtained multiplying the score risk by 3 in men and by 5 in women.
